# Supplementary material for: Mutation of DNA Polymerase β R137Q Results in Retarded Embryo Development Due to Impaired DNA Base Excision Repair in Mice
Source: PubMed Central journal article supplement (PMC4928080; doi:10.1038/srep28614), 2016-06-30
Supplement: srep28614-s1.pdf [file srep28614-s1.pdf]

## Mutation of DNA Polymerase $\beta$ R137Q Results in Retarded Embryo Development Due to Impaired DNA Base Excision Repair in Mice

Feiyan Pan<sup>1,a</sup>, Jing Zhao<sup>1,a</sup>, Ting Zhou<sup>1,a</sup>, Zihui Kuang<sup>2</sup>, Huifang Dai<sup>3</sup>, Huan Wu<sup>1</sup>, Hongfang Sun<sup>1</sup>, Xiaolong Zhou<sup>1</sup>, Xuping Wu<sup>2</sup>, Zhigang Hu<sup>1</sup>, Lingfeng He<sup>1</sup>, Binghui Shen<sup>3</sup>, Zhigang Guo<sup>1\*</sup>

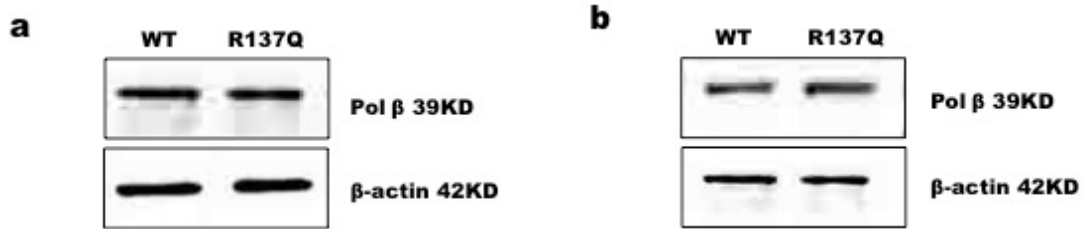

**Supplementary Figure. S1** The protein levels of Pol  $\beta$  in tissues and cell lysate from WT and R137Q. Pol  $\beta$  protein levels were examined by Western blot. Tubulin was immunoblotted as a loading control. (a) Tissue lysate. (b) Cell lysate.

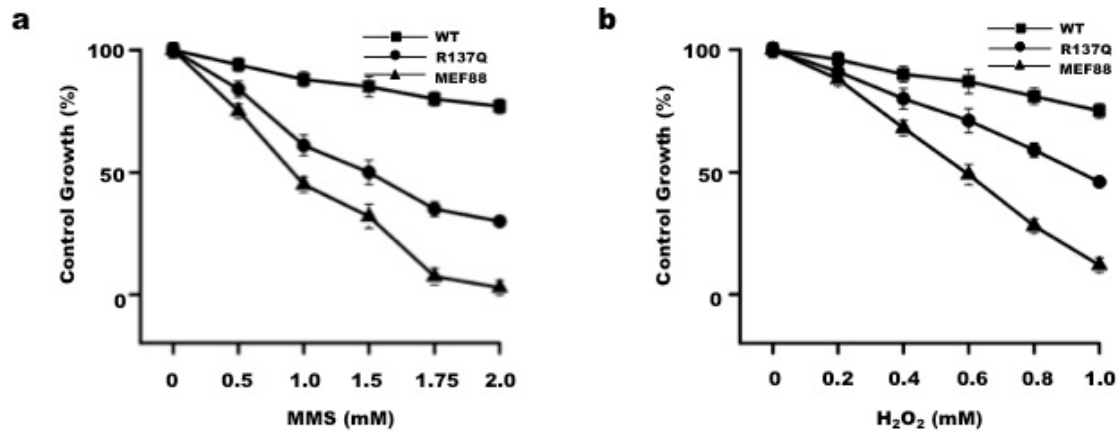

**Supplementary Figure. S2 Sensitivity assay in WT, R137Q and Pol  $\beta$  knockout MEFs.**  $1 \times 10^5$  cells per well were plated in triplicate in six well plates, cells were treated or untreated with different dose of MMS or H<sub>2</sub>O<sub>2</sub> for 2 hours. After treatment, the cells were washed with PBS and cultured in a fresh media for 3 days. The number of viable cells in every well was determined by trypsinized cells and counting with a cell counter (CountStar IC1000). The control growth ratio was calculated by treated/untreated cell numbers. Pol  $\beta$  knockout MEFs, MEF88. Data represents mean  $\pm$  SD from triplicate wells. The experiments were repeated three times.
